RESEARCH ARTICLE

# Changes in haematological indices among children with sickle cell disease on hydroxyurea treatment for at least 1 year: A cohort study

Stephen Emuli<sup>1</sup>, Crispus Tegu<sup>1</sup>, Faith Oguttu<sup>1,2\*</sup>, Ritah Nantale<sup>2</sup>, Paul Ochieng<sup>3</sup>, George Passi<sup>2</sup>, Julian Abeso<sup>4</sup>, Joan Wamulugwa<sup>4</sup>, Milton W. Musaba<sup>5</sup>, Ruth Namazi<sup>6</sup>, Sarah Kiguli<sup>6</sup>, David Mukunya<sup>2</sup>

**1** Department of Paediatrics and Child Health, Busitema University, Mbale, Uganda, **2** Department of Community and Public Health, Busitema University, Mbale, Uganda, **3** Department of Anaesthesia and Critical Care, Busitema University, Mbale, Uganda, **4** Department of Paediatrics and Child Health, Mbale regional referral hospital, Mbale, Uganda, **5** Department of Obstetrics and Gynaecology, Busitema University, Mbale, Uganda, **6** Department of Paediatrics and Child Health, Makerere University, Kampala, Uganda

\* [faithfaithoguttu@gmail.com](mailto:faithfaithoguttu@gmail.com)

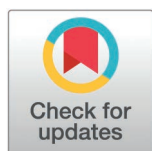

**OPEN ACCESS**

**Citation:** Emuli S, Tegu C, Oguttu F, Nantale R, Ochieng P, Passi G, et al. (2025) Changes in haematological indices among children with sickle cell disease on hydroxyurea treatment for at least 1 year: A cohort study. PLoS One 20(11): e0335617. <https://doi.org/10.1371/journal.pone.0335617>

**Editor:** Santosh L. Saraf, University of Illinois at Chicago, UNITED STATES OF AMERICA

**Received:** August 12, 2025

**Accepted:** October 14, 2025

**Published:** November 3, 2025

**Copyright:** © 2025 Emuli et al. This is an open access article distributed under the terms of the [Creative Commons Attribution License](https://creativecommons.org/licenses/by/4.0/), which permits unrestricted use, distribution, and reproduction in any medium, provided the original author and source are credited.

**Data availability statement:** All relevant data are within the manuscript and its [Supporting Information](#) files.

**Funding:** SE received funding from the "National Institutes of Health's, FOGARTY INTERNATIONAL CENTER to "Enhancing

## Abstract

### Background

Sickle cell disease is the 12<sup>th</sup> cause of under-five mortality in Africa, with over 81,000 deaths attributed to sickle cell disease annually. Hydroxyurea is one of the few disease-modifying therapies available for the management of sickle cell disease. This study aimed to assess changes in haematological indices among children who had been initiated on hydroxyurea for at least one year in a non-trial setting at a regional referral hospital in Eastern Uganda.

### Methods

We conducted a cohort study, which included children who attended the sickle cell clinic from 21/Aug/2024 to 30/Oct/2024. Data were analyzed using Stata version 18.0. We conducted a paired sample t-test comparing the haematological indices of children with sickle cell disease at baseline and at least one year later.

### Results

We included 324 children. Nearly half 155/324 (47.8%) of the participants had good monthly adherence to hydroxyurea. The mean haemoglobin level at follow-up increased by 0.77g/dl ( $p < 0.001$ ) from 7.07g/dl (SD 0.10) at baseline to 7.84g/dl (SD 0.09). There was an increase in the mean corpuscular volume [0.97fl ( $p = 0.645$ )] and mean corpuscular haemoglobin [0.58pg ( $p = 0.120$ )]. The white blood cell count decreased by  $6.17 \times 10^3/\mu\text{l}$  ( $p < 0.001$ ) from  $20.77 \times 10^3/\mu\text{l}$  (SD  $\pm 0.806$ ) at baseline to

Research Capacity for Sickle Cell Disease and related NCDs across the Lifespan in Uganda, Enrich Project under award number D43TW012466. The funders did not play any role in the study design, data collection and analysis, decision to publish, or preparation of the manuscript.

**Competing interests:** The authors have declared that no competing interests exist.

14.60x10<sup>3</sup>/μl (SD ± 0.613) at follow-up. The differential white cell counts of neutrophils, lymphocytes, monocytes, and basophils also decreased.

## Conclusion

Hydroxyurea resulted in an increase in mean haemoglobin level and a decrease in absolute and differential white blood cell count. The benefit was more pronounced among children with good adherence to hydroxyurea. We add our voice to calls for continued advocacy for the availability of hydroxyurea for use by children with sickle cell disease in low-resource settings. We also recommend a routine complete blood count to monitor response to treatment and also guide patient management among children with sickle cell disease initiated on hydroxyurea.

## Introduction

Globally, half a million babies are born with Sickle Cell Disease (SCD) each year, and 80% of them are in Africa [1]. Sickle cell disease is the 12<sup>th</sup> cause of under-five mortality in Africa, with over 81,000 deaths attributed to SCD annually [1]. Children with SCD in Africa are 11 times more likely to die secondary to complications of SCD as compared to their counterparts in high-income countries [2]. Various efforts including newborn screening, penicillin prophylaxis, folic acid supplementation, and vaccination to alleviate morbidity and mortality secondary to SCD, have been implemented but mortality due to SCD is still high [3]. Hydroxyurea (hydroxycarbamide) is one of the few disease-modifying therapies available for the management of sickle cell disease [4].

The primary mechanism of action by which hydroxyurea is effective in individuals with SCD is through the induction of production of fetal haemoglobin, which results in decreased production of sickled haemoglobin. Other suggested mechanisms of action of hydroxyurea include: suppression of bone marrow activity resulting in reduced production of other cells such as white blood cells and platelets, inhibition of ribonucleotide reductase, which results in arrest of maturation of developing cells, and finally, it is metabolised to produce nitric oxide [5]. Production of red blood cells containing fetal haemoglobin reduces the formation of sickle-shaped cells, resulting in improved oxygen carrying capacity of blood, reduced vaso-occlusive episodes, hemolysis, reticulocytosis, and stable erythropoiesis. Nitric oxide produced after metabolism of hydroxyurea acts as a vasodilator, which improves blood flow and reduces adhesion of sickled cells to endothelium [5]. Due to the diverse effects of hydroxyurea as a therapeutic agent, regular monitoring of haematological cell lines is imperative to assess response to treatment, optimal dosing, effectiveness, and any bone marrow suppression.

A number of clinical trials have proven the efficacy and safety of hydroxyurea among children with sickle cell anemia in sub-Saharan Africa [6–9]. Improved haemoglobin levels and mean corpuscular volume, mild bone marrow suppression indicated by reduced white blood cell count, absolute neutrophil count, and reticulocyte count have been reported among children taking hydroxyurea treatment [6,7]. However,

hardly any studies have been done among children in the general population outside a trial setting to assess the therapeutic effect of hydroxyurea. Outside a clinical trial setting, adherence and monitoring of lifesaving drugs such as hydroxyurea is not as stringent due to health system factors and social challenges faced by the patients [10]. There is a need to generate data to inform routine monitoring of patients for response to treatment in a normal clinical setting.

The Ministry of health in Uganda added hydroxyurea to the list of essential medicines in 2016 [11]. Hydroxyurea is supplied to national and regional hospitals where children can access the drug through the hospital-based sickle cell clinics. Since the national implementation of the drug, minimal efforts to monitor the effect of the drug outside a clinical trial setting have been fully implemented. There is need to further understand the haematological profiles of children initiated on hydroxyurea so as to guide management, follow up, and optimize treatment protocols in low-resource settings. We conducted a cohort study to assess the changes in haematological indices among children who had been initiated on hydroxyurea for at least one year at a regional referral hospital in Eastern Uganda.

## Methods

### Study design

We conducted a cohort study. We included children who attended the sickle cell clinic during the study period from 21/Aug/2024–30/Oct/2024.

### Study setting

The study was conducted at the Sickle cell clinic of Mbale regional referral hospital. Mbale regional referral hospital is a public hospital in Eastern Uganda, serving a population of about 4.5 million people from over 16 districts in the region, and provides obstetrics and gynaecology, paediatrics, surgery, and internal medicine services. The paediatrics department runs a sickle cell clinic every Wednesday, where over 800 children were registered at the time of the study. All children enrolled in the clinic are of genotype HBSS [8]. Children are routinely reviewed, have their drug refills, and are readmitted if necessary.

### Study population

We included 324 children aged 2–17 years, with a confirmed diagnosis of sickle cell anaemia. We included children with a baseline complete blood count prior to initiation of hydroxyurea. Children not initiated on hydroxyurea or who had been taking hydroxyurea for less than 1 year were excluded.

### Sampling and sample size

Given our recruitment period and target population, we anticipated to recruit 320 participants. With this number, we would have 90% power to detect differences of 0.18 g/dl and above in haemoglobin (our primary outcome), assuming that our baseline haemoglobin was 7.0g/dl and standard deviation was 1 (Stata code: power pairedmeans 7, n(320) power(0.9) sddiff [1]). We consecutively recruited the eligible children attending the sickle cell clinic from 21/Aug/2024–30/Oct/2024 when the required sample size was accrued.

### Study procedures

Data were collected by a trained research assistant using a structured questionnaire. A blood sample was picked and taken to the laboratory for processing. Patient records were reviewed to obtain data for baseline blood count.

### Sample collection and processing

A venous blood sample was taken from the study participant in the procedure room and kept in a purple top vacutainer. The samples collected were taken to the Mbale Regional Referral Hospital main haematology laboratory for analysis

within 1 hour. The Sysmex automated Complete Blood Count machine was used. Controls were first run to ensure appropriate calibration of the machine. The sample in the vacutainer was first shaken, then inserted into the sample holder of the machine for analysis, within 3 hours of collection. The printouts of the results were collected by research assistants and entered into the data collection form designed in Kobo Toolbox.

The authors did not have access to information that could identify individual participants during or after data collection.

### Ethics

We obtained ethical approval from the Busitema Research and Ethics Committee, approval number BUFHS REC-2014–180.

We obtained informed written consent from all the caretakers and assent from children aged 12–17years.

### Data analysis

Data from Kobo toolbox were exported to an Microsoft Excel spreadsheet and imported into Stata version 18.0 (StataCorp) for analysis. Descriptive statistics were computed for the dependent and independent variables. We conducted a paired sample t-test comparing the haematological indices of children with sickle cell disease at baseline and the current haematological indices.

Variables: The outcome variables were changes in red blood cell indices (red blood cell count, haemoglobin level, mean corpuscular volume, and mean corpuscular haemoglobin), white blood cell indices (white blood cell count, neutrophils, lymphocytes, monocytes, basophils, and eosinophils), and platelet count. The main exposure variable was initiation on hydroxyurea.

### Results

We screened 352 children and enrolled 324 children. Reasons for exclusion are detailed in [Fig 1](#).

Nearly half 47.8% (155/324) of the participants were male, almost half of the children 48.1% (156/324) were aged 6–12 years, and the median age was 10.5 years (IQR 7–13). Details are in [Table 1](#).

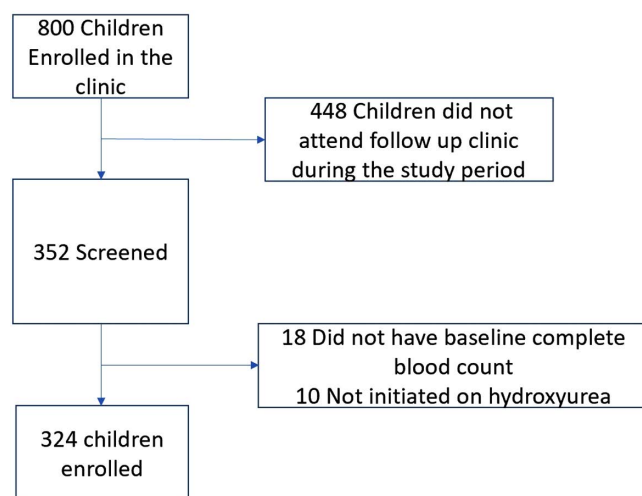

**Fig 1. A flow chart showing screening and inclusion criteria for a study among children attending a sickle cell disease clinic.**

<https://doi.org/10.1371/journal.pone.0335617.g001>

**Table 1. Sociodemographic characteristics of children with sickle cell disease initiated on hydroxyurea for at least one year.**

|                                  | Total (frequency) N=324 |
|----------------------------------|-------------------------|
| Age of child                     |                         |
| ≤ 5 years                        | 63 (19.4)               |
| 6–12 years                       | 156 (48.1)              |
| 13–17 years                      | 105 (32.4)              |
| Gender                           |                         |
| Male                             | 155 (47.8)              |
| Female                           | 169 (52.2)              |
| Place of residence               |                         |
| Rural                            | 224 (69.1)              |
| Urban                            | 100 (30.9)              |
| Distance to facility in Km       |                         |
| ≤ 5                              | 90 (27.8)               |
| > 5                              | 234 (72.2)              |
| Caretaker of child               |                         |
| Both parents                     | 248 (76.5)              |
| Single parent                    | 42 (13.0)               |
| Other relatives                  | 34 (10.5)               |
| Education level of the caregiver |                         |
| No formal education              | 11 (3.4)                |
| Primary                          | 161 (49.7)              |
| Secondary                        | 93 (28.7)               |
| Tertiary                         | 59 (18.2)               |

<https://doi.org/10.1371/journal.pone.0335617.t001>

Nearly half 155/324 (47.8%) of the participants had good monthly adherence to hydroxyurea, 85/324 (25.3%) missed hydroxyurea for less than 7 days in a month, 29/324 (8.95%) missed hydroxy urea for more than 7 days in a month and 58/324 (17.9%) missed hydroxyurea for more than a month, 244/324 (75.3%) had malaria in the past one year and 142/324 (43.8%) had received a blood transfusion over the past one year. Details are in [Table 2](#).

### Changes in haematological indices among children with sickle cell disease, after initiation of hydroxyurea for at least one year

**Red blood cell indices.** The mean haemoglobin level at follow-up increased by 0.77g/dl ( $p < 0.001$ ) from 7.07g/dl (SD 0.10) at baseline to 7.84g/dl (SD 0.09). The mean corpuscular volume (MCV) increased by 0.977fl ( $p = 0.645$ ) from 84.42fl (SD 2.09) at baseline to 85.39fl (SD 0.66) at follow-up. The mean corpuscular haemoglobin increased by 0.58pg ( $p = 0.120$ ) from 29.36pg (SD = 0.36) at baseline to 29.94pg (SD ± 0.22) at follow-up. This is summarized in [Table 3](#).

**White blood cell indices.** The white blood cell count decreased by  $6.17 \times 10^3/\mu\text{l}$  ( $p < 0.001$ ) from  $20.77 \times 10^3/\mu\text{l}$  (SD ± 0.806) at baseline to  $14.60 \times 10^3/\mu\text{l}$  (SD ± 0.613) at follow-up. The neutrophil count decreased by  $4.09 \times 10^3/\mu\text{l}$  ( $p < 0.001$ ) from  $9.77 \times 10^3/\mu\text{l}$  (SD ± 0.55) at baseline to  $5.68 \times 10^3/\mu\text{l}$  (SD ± 0.29) at follow-up. Lymphocytes, monocytes and basophils also decreased. Details are summarized in [Table 3](#).

**Platelets.** The platelet count increased by  $38.19 \times 10^3/\mu\text{l}$  ( $p = 0.001$ ) from  $363.85 \times 10^3/\mu\text{l}$  (SD ± 9.57) at baseline, to  $402.04 \times 10^3/\mu\text{l}$  (SD ± 9.85) at follow-up.

**Table 2. Clinical characteristics of children with sickle cell disease initiated on hydroxyurea for at least one year.**

|                                                | Total (frequency) N=324 |
|------------------------------------------------|-------------------------|
| Received blood transfusions in the last 1 year |                         |
| Yes                                            | 142 (43.8)              |
| No                                             | 182 (56.2)              |
| Hospitalized in last 12 months                 |                         |
| Yes                                            | 242 (74.7)              |
| No                                             | 82 (25.3)               |
| Occurrence of painful crises in last year      |                         |
| Yes                                            | 283 (87.3)              |
| No                                             | 41 (12.7)               |
| Malaria in the last one year                   |                         |
| Yes                                            | 244 (75.3)              |
| No                                             | 80 (24.7)               |
| Hydroxyurea adherence monthly                  |                         |
| Very good (did not miss a day)                 | 155 (47.8)              |
| Good (missed <7 days in a month)               | 82 (25.3)               |
| Poor (missed ≥ 7 days in a month)              | 29 (8.95)               |
| Very poor (missed > 30 days)                   | 58(17.9)                |

<https://doi.org/10.1371/journal.pone.0335617.t002>

### Changes in haematological indices among children with sickle cell disease, after initiation of hydroxyurea for at least one year, stratified by adherence

Overall, the children who had good adherence to hydroxyurea (missed less than 7 days a month) had a more marked increase in the red blood cell indices and a more marked decrease in the white blood cell indices as compared to children with poor adherence to hydroxyurea. Details are in [Table 4](#).

### Discussion

We noted an increase in the red blood cell indices: red blood cell count, haemoglobin level, mean corpuscular volume, mean haemoconcentration, and platelet count. There was a decrease in the white blood cell indices: white blood cell count and differential white cell count (neutrophils, lymphocytes, monocytes, basophils, and eosinophils). All these changes were more pronounced among children with good adherence to hydroxyurea.

#### Increase in red blood cell indices

Increase in red blood cell count is due to the fact that hydroxyurea induces improved erythropoiesis with the production of more stable red blood cells rich in fetal haemoglobin [12]. These red blood cells are less liable to haemolysis, grow to maturity, and this allows a higher red blood cell count to accumulate in circulation [5]. The reduction in haemolysis and increased life span of the fetal haemoglobin-rich red blood cells also results in the observed increase in the level of haemoglobin. The newly formed red blood cells have a larger diameter, which results in an increase in mean corpuscular volume (MCV). Hydroxyurea also causes mild bone suppression, this reduces the production of smaller reticulocytes and leads to a relative increase in larger mature red blood cells, hence increased MCV.

The average amount of haemoglobin per red blood cell (Mean Corpuscular Haemoglobin (MCH)) increases due to the fact that the newly produced red blood cells have an increased lifespan, which allows them to mature and results in more stable red blood cells with high haemoglobin concentration. Other studies in Uganda have also reported an increase in red

**Table 3. Changes in haematological indices among children with sickle cell disease, after initiation of hydroxyurea for at least one year.**

|                                                      | Mean   | SD    | Mean difference | t      | p-Value |
|------------------------------------------------------|--------|-------|-----------------|--------|---------|
| Red blood cell count ( $\times 10^6/\mu\text{l}$ )   |        |       |                 |        |         |
| Baseline                                             | 2.58   | 0.05  | 0.13            | 2.139  | 0.033   |
| Current                                              | 2.71   | 0.05  |                 |        |         |
| Haemoglobin Level (g/dl)                             |        |       |                 |        |         |
| Baseline                                             | 7.07   | 0.10  | 0.77            | 6.919  | <0.001  |
| Current                                              | 7.84   | 0.09  |                 |        |         |
| Mean corpuscular volume (fl)                         |        |       |                 |        |         |
| Baseline                                             | 84.42  | 2.09  | 0.97            | 0.460  | 0.645   |
| Current                                              | 85.39  | 0.66  |                 |        |         |
| Mean corpuscular haemoconcentration (pg)             |        |       |                 |        |         |
| Baseline                                             | 29.36  | 0.36  | 0.58            | 1.561  | 0.120   |
| Current                                              | 29.94  | 0.22  |                 |        |         |
| White blood cell count ( $\times 10^3/\mu\text{l}$ ) |        |       |                 |        |         |
| Baseline                                             | 20.77  | 0.806 | -6.17           | -7.235 | <0.001  |
| Current                                              | 14.60  | 0.613 |                 |        |         |
| Neutrophils ( $\times 10^3/\mu\text{l}$ )            |        |       |                 |        |         |
| Baseline                                             | 9.77   | 0.55  | -4.09           | -6.641 | <0.001  |
| Current                                              | 5.68   | 0.29  |                 |        |         |
| Lymphocytes ( $\times 10^3/\mu\text{l}$ )            |        |       |                 |        |         |
| Baseline                                             | 9.04   | 0.48  | -0.16           | -0.067 | 0.946   |
| Current                                              | 8.89   | 2.27  |                 |        |         |
| Monocytes ( $\times 10^3/\mu\text{l}$ )              |        |       |                 |        |         |
| Baseline                                             | 1.82   | 0.10  | -0.57           | -5.868 | <0.001  |
| Current                                              | 1.25   | 0.04  |                 |        |         |
| Basophils ( $\times 10^3/\mu\text{l}$ )              |        |       |                 |        |         |
| Baseline                                             | 0.40   | 0.08  | -0.22           | -2.739 | 0.007   |
| Current                                              | 0.18   | 0.01  |                 |        |         |
| Eosinophils ( $\times 10^3/\mu\text{l}$ )            |        |       |                 |        |         |
| Baseline                                             | 0.65   | 0.10  | 0.24            | 1.289  | 0.198   |
| Current                                              | 0.89   | 0.16  |                 |        |         |
| Platelets ( $\times 10^3/\mu\text{l}$ )              |        |       |                 |        |         |
| Baseline                                             | 363.85 | 9.57  | 38.19           | 3.237  | 0.001   |
| Current                                              | 402.04 | 9.85  |                 |        |         |

<https://doi.org/10.1371/journal.pone.0335617.t003>

blood cell indices such as; – red blood cell count, level of haemoglobin, MCV, and MCH among children after initiation of hydroxyurea [6–8]. Studies in other countries such as India [13,14], Iran [15], and America [16] have also reported similar findings. This similarity in findings can be explained by the fact that the mechanism of action of hydroxyurea is the same in all patient populations.

### Decrease in white blood cell indices

Decrease in white blood cell count is due to the cytoreductive effect of hydroxyurea [17]. Hydroxyurea reduces proliferation in the bone marrow by inhibiting the ribonucleotide reductase required for Deoxyribonucleic acid (DNA) synthesis. This results in decreased production of myeloblasts, hence a decrease in white blood cell count and decreased differential white cell count [18]. Children started on hydroxyurea have reduced sickling and haemolysis as well as

**Table 4. Changes in haematological indices among children with sickle cell disease, after initiation of hydroxyurea for at least one year, stratified by adherence.**

|                                                      | Good adherence | Poor adherence | Good adherence       | Poor adherence |
|------------------------------------------------------|----------------|----------------|----------------------|----------------|
|                                                      | Mean count     |                | Mean difference (SD) |                |
| Red blood cell count ( $\times 10^6/\mu\text{l}$ )   |                |                |                      |                |
| Baseline                                             | 2.56           | 2.62           | 0.15(1.19)           | 0.07(0.93)     |
| Current                                              | 2.71           | 2.69           |                      |                |
| Haemoglobin Level (g/dl)                             |                |                |                      |                |
| Baseline                                             | 7.05           | 7.11           | 0.82(1.93)           | 0.61(2.14)     |
| Current                                              | 7.87           | 7.73           |                      |                |
| Mean corpuscular volume (fl)                         |                |                |                      |                |
| Baseline                                             | 82.72          | 81.7           | 4.09(17.20)          | 0.22(13.55)    |
| Current                                              | 86.82          | 81.47          |                      |                |
| Mean corpuscular haemoconcentration (pg)             |                |                |                      |                |
| Baseline                                             | 29.5           | 28.96          | 0.76(6.48)           | 0.07(7.28)     |
| Current                                              | 30.27          | 29.04          |                      |                |
| White blood cell count ( $\times 10^3/\mu\text{l}$ ) |                |                |                      |                |
| Baseline                                             | 20.66          | 21.03          | -6.21(16.36)         | -6.02(12.22)   |
| Current                                              | 14.44          | 15.01          |                      |                |
| Neutrophils ( $\times 10^3/\mu\text{l}$ )            |                |                |                      |                |
| Baseline                                             | 9.95           | 9.25           | -4.44(12.05)         | -3.12(7.78)    |
| Current                                              | 5.51           | 6.13           |                      |                |
| Lymphocytes ( $\times 10^3/\mu\text{l}$ )            |                |                |                      |                |
| Baseline                                             | 8.61           | 10.22          | -1.97(11.18)         | -2.75(11.62)   |
| Current                                              | 6.64           | 7.46           |                      |                |
| Monocytes ( $\times 10^3/\mu\text{l}$ )              |                |                |                      |                |
| Baseline                                             | 1.72           | 2.06           | 0.53(1.67)           | -0.67(1.94)    |
| Current                                              | 1.196          | 1.38           |                      |                |
| Basophils ( $\times 10^3/\mu\text{l}$ )              |                |                |                      |                |
| Baseline                                             | 0.33           | 0.57           | -0.14(0.90)          | -0.41(2.37)    |
| Current                                              | 0.18           | 0.16           |                      |                |
| Eosinophils ( $\times 10^3/\mu\text{l}$ )            |                |                |                      |                |
| Baseline                                             | 0.7            | 0.49           | 0.25(3.88)           | 0.21(1.24)     |
| Current                                              | 0.95           | 0.7            |                      |                |
| Platelets ( $\times 10^3/\mu\text{l}$ )              |                |                |                      |                |
| Baseline                                             | 365.67         | 358.88         | 33.36(227.12)        | 51.35(166.20)  |
| Current                                              | 399.03         | 410.24         |                      |                |

<https://doi.org/10.1371/journal.pone.0335617.t004>

improved endothelial function [19]. This results in reduced systemic inflammation and a reduced immune stimulation for the production of white blood cells [16]. Our findings are supported by other studies that have also reported a decrease in absolute and differential white blood cell count among children with SCD taking hydroxyurea [14, 16, 20]. This similarity in findings can be explained by the fact that the mechanism of action of hydroxyurea is the same in all patient populations.

These observed changes in red blood cell and white blood cell indices can be used as indicators of hydroxyurea efficacy in children with SCD in a routine clinical setting. Clinicians can use these indices to assess response to therapy and adjust dosing appropriately.

### Increase in platelet count

Our study also noted a significant increase in mean platelet count after initiation of hydroxyurea. This was contrary to the expected myelosuppressive effect of hydroxyurea on platelet production. This is also contrary to other studies, which have reported a decrease in platelet count among patients with hydroxyurea [14] and reports of thrombocytopenia as a known side effect of hydroxyurea [16]. This paradoxical increase of platelets among patients taking hydroxyurea has also been reported among children with SCD in the United States [21], Saudi Arabia [22], and Brazil [23]. The noted increase in platelet count may be due to individual variations in bone marrow response to hydroxyurea [24]. Among patients still in the early phase of hydroxyurea therapy initiation or receiving suboptimal doses of hydroxyurea, the drug may not cause enough myelosuppression to reduce platelet production.

### Haematological response stratified by adherence to hydroxyurea

Therapeutic benefits such as an increase in red blood cell indices and a decrease in white blood cells were more marked among children with good adherence to hydroxyurea. The changes in red blood cell indices and white blood cell indices were nonetheless suboptimal in comparison to changes observed among children enrolled in the NOHARM-MTD trial [25]. This can be explained by the fact that in a trial setting, participants have better adherence due to an adequate supply of hydroxyurea. Drugs are prescribed and dispensed more accurately in a trial setting, and dose escalation is also done with adequate monitoring.

In our study, good adherence was assessed by word of mouth which is unreliable, and good adherence was considered if a participant had missed less than 7 days in a month. Hydroxyurea is prescribed at 15–25 mg/kg and dispensed to the closest 500 mg capsule for age, therefore children receive suboptimal doses. This is minimized in a clinical trial setting where tablet formulations are dispensed more accurately and dosing can be increased to 30 mg/kg.

These findings highlight the need to emphasize adherence to hydroxyurea even in routine clinical settings. We also recommend and advocate for closer monitoring and titration of hydroxyurea to maximum tolerated doses in routine clinic settings.

### Strengths and limitations

We ably collected baseline data and follow-up data a year later for comparison. This is one of the first studies to be done in our routine clinical setting versus a clinical trial. Data for adherence to hydroxyurea was elicited from history obtained from caregivers, this is unreliable and subject to bias due to social desirability. We did not collect medical history about blood transfusions and admissions one year prior to initiation of hydroxyurea, therefore, we could not compare these characteristics to assess the efficacy of hydroxyurea. We also did not collect data about nutrition and supplements such as folate, which affect haemoglobin levels among children. This was a single-site study, so our findings may not be generalizable to the general population.

### Conclusion

Our study found that hydroxyurea was of therapeutic benefit to the children, as evidenced by an increase in mean haemoglobin level and a decrease in white blood cell count. The benefit was more pronounced among children with good adherence. We recommend continued advocacy for the availability of hydroxyurea for use by children with sickle cell disease in low-resource settings. We also recommend a routine complete blood count to monitor response to treatment and also guide patient management among children with sickle cell disease initiated on hydroxyurea.

### Supporting information

#### S1 Data.

(XLS)

## Acknowledgments

We would like to acknowledge all the participants in this study and Mbale regional referral hospital team, which contributed to the success of this study.

## Author contributions

**Conceptualization:** Stephen Emuli, Crispus Tegu, David Mukunya.

**Data curation:** Faith Oguttu, Ritah Nantale, David Mukunya.

**Formal analysis:** Faith Oguttu, Ritah Nantale, David Mukunya.

**Funding acquisition:** Stephen Emuli, Milton W Musaba, Ruth Namazi, Sarah Kiguli, David Mukunya.

**Investigation:** Stephen Emuli.

**Methodology:** Crispus Tegu, Milton W Musaba, Sarah Kiguli.

**Software:** David Mukunya.

**Supervision:** Julian Abeso, Joan Wamulugwa, Milton W Musaba, Sarah Kiguli, David Mukunya.

**Validation:** Crispus Tegu, Paul Ochieng, George Passi, Julian Abeso, Joan Wamulugwa, Milton W Musaba, Ruth Namazi, Sarah Kiguli, David Mukunya.

**Visualization:** Paul Ochieng, George Passi, David Mukunya.

**Writing – original draft:** Stephen Emuli, Faith Oguttu, David Mukunya.

**Writing – review & editing:** Crispus Tegu, Faith Oguttu, Ritah Nantale, Paul Ochieng, George Passi, Julian Abeso, Joan Wamulugwa, Milton W Musaba, Ruth Namazi, Sarah Kiguli, David Mukunya.

## References

1. Thomson AM, McHugh TA, Oron AP, Tepy C, Lonberg N, Vilchis Tella V. Global, regional, and national prevalence and mortality burden of sickle cell disease, 2000–2021: a systematic analysis from the Global Burden of Disease Study 2021. *The Lancet Haematology*. 2023;10(8):e585–99.
2. Wastnedge E, Waters D, Patel S, Morrison K, Goh MY, Adeyoye D, et al. The global burden of sickle cell disease in children under five years of age: a systematic review and meta-analysis. *J Glob Health*. 2018;8(2):021103. <https://doi.org/10.7189/jogh.08.021103> PMID: 30574296
3. Ally M, Balandya E. Current challenges and new approaches to implementing optimal management of sickle cell disease in sub-Saharan Africa. *Semin Hematol*. 2023;60(4):192–9. <https://doi.org/10.1053/j.seminhematol.2023.08.002> PMID: 37730472
4. McGann PT, Ware RE. Hydroxyurea therapy for sickle cell anemia. 2015;14(11):1749–58.
5. Ware RE, Despotovic JM, Mortier NA, Flanagan JM, He J, Smeltzer MP, et al. Pharmacokinetics, pharmacodynamics, and pharmacogenetics of hydroxyurea treatment for children with sickle cell anemia. *Blood*. 2011;118(18):4985–91. <https://doi.org/10.1182/blood-2011-07-364190> PMID: 21876119
6. Tshilolo L, Tomlinson G, Williams TN, Santos B, Olupot-Olupot P, Lane A, et al. Hydroxyurea for Children with Sickle Cell Anemia in Sub-Saharan Africa. *N Engl J Med*. 2019;380(2):121–31. <https://doi.org/10.1056/NEJMoa1813598> PMID: 30501550
7. Opoka RO, Ndugwa CM, Latham TS, Lane A, Hume HA, Kasirye P, et al. Novel use Of Hydroxyurea in an African Region with Malaria (NOHARM): a trial for children with sickle cell anemia. *Blood*. 2017;130(24):2585–93. <https://doi.org/10.1182/blood-2017-06-788935> PMID: 29051184
8. McGann PT, Tshilolo L, Santos B, Tomlinson GA, Stuber S, Latham T, et al. Hydroxyurea Therapy for Children With Sickle Cell Anemia in Sub-Saharan Africa: Rationale and Design of the REACH Trial. *Pediatr Blood Cancer*. 2016;63(1):98–104. <https://doi.org/10.1002/psc.25705> PMID: 26275071
9. Namazzi R, Bond C, Conroy AL, Datta D, Tagoola A, Goings MJ, et al. Hydroxyurea reduces infections in children with sickle cell anemia in Uganda. *Blood*. 2024;143(14):1425–8. <https://doi.org/10.1182/blood.2023021575> PMID: 38169476
10. Brauholtz DA, Edwards SJ, Lilford RJ. Are randomized clinical trials good for us (in the short term)? Evidence for a “trial effect”. *J Clin Epidemiol*. 2001;54(3):217–24. [https://doi.org/10.1016/s0895-4356\(00\)00305-x](https://doi.org/10.1016/s0895-4356(00)00305-x) PMID: 11223318
11. Ministry of health Uganda. Essential Medicines and Health Supplies List for Uganda (EMHSLU). 2016. <https://library.health.go.ug/>
12. Dover G, Humphries R, Moore J, Ley T, Young N, Charache S, et al. Hydroxyurea induction of hemoglobin F production in sickle cell disease: relationship between cytotoxicity and F cell production. 1986.

13. Barma SK, Dash MR, Samal SR, Sethy G, Panigrahi P. Effect of hydroxyurea on clinical and haematological profile of children with sickle cell anaemia. *Res Rev.* 2020;7(7):493–9.
14. Joshi N, Jain N, Ramawat P. Impact of hydroxyurea therapy on clinicohematological parameters in children with sickle cell anemia. *Indian J Child Health.* 2021;8(2):100–3. <https://doi.org/10.32677/ijch.2021.v08.i02.008>
15. Keikhaei B, Yousefi H, Bahadoram M. Hydroxyurea: Clinical and Hematological Effects in Patients With Sickle Cell Anemia. *Glob J Health Sci.* 2015;8(3):252–6. <https://doi.org/10.5539/gjhs.v8n3p252> PMID: [26493428](https://pubmed.ncbi.nlm.nih.gov/26493428/)
16. Luchtman-Jones L, Pressel S, Hilliard L, Brown RC, Smith MG, Thompson AA, et al. Effects of hydroxyurea treatment for patients with hemoglobin SC disease. *Am J Hematol.* 2016;91(2):238–42. <https://doi.org/10.1002/ajh.24255> PMID: [26615793](https://pubmed.ncbi.nlm.nih.gov/26615793/)
17. Kapor S, Čokić V, Santibanez JF. Mechanisms of Hydroxyurea-Induced Cellular Senescence: An Oxidative Stress Connection?. *Oxid Med Cell Longev.* 2021;2021:7753857. <https://doi.org/10.1155/2021/7753857> PMID: [34707779](https://pubmed.ncbi.nlm.nih.gov/34707779/)
18. Ware RE. How I use hydroxyurea to treat young patients with sickle cell anemia. *Blood.* 2010;115(26):5300–11. <https://doi.org/10.1182/blood-2009-04-146852> PMID: [20223921](https://pubmed.ncbi.nlm.nih.gov/20223921/)
19. Covas DT, de Lucena Angulo I, Vianna Bonini Palma P, Zago MA. Effects of hydroxyurea on the membrane of erythrocytes and platelets in sickle cell anemia. *Haematologica.* 2004;89(3):273–80. PMID: [15020264](https://pubmed.ncbi.nlm.nih.gov/15020264/)
20. Lederman HM, Connolly MA, Kalpatthi R, Ware RE, Wang WC, Luchtman-Jones L, et al. Immunologic effects of hydroxyurea in sickle cell anemia. *Pediatrics.* 2014;134(4):686–95. <https://doi.org/10.1542/peds.2014-0571> PMID: [25180279](https://pubmed.ncbi.nlm.nih.gov/25180279/)
21. Hankins JS, Ware RE, Rogers ZR, Wynn LW, Lane PA, Scott JP, et al. Long-term hydroxyurea therapy for infants with sickle cell anemia: the HUSOFT extension study. *Blood.* 2005;106(7):2269–75. <https://doi.org/10.1182/Blood-2004-12-4973> PMID: [16172253](https://pubmed.ncbi.nlm.nih.gov/16172253/)
22. Alzahrani F, Albaz GF, AlSinan F, Alzuhayri J, Barnawi ZM, Melebari N. Hydroxyurea use among children with sickle cell disease at King Abdulaziz University Hospital in Jeddah City. *Cureus.* 2021;13(2).
23. Santos FKS, Maia CN. Patients with sickle cell disease taking hydroxyurea in the Hemocentro Regional de Montes Claros. *Rev Bras Hematol Hemoter.* 2011;33(2):105–9. <https://doi.org/10.5581/1516-8484.20110029> PMID: [23284256](https://pubmed.ncbi.nlm.nih.gov/23284256/)
24. Tefferi A, Elliott MA, Kao PC, Yoon S, El-Hemaidi I, Pearson TC. Hydroxyurea-induced marked oscillations of platelet counts in patients with polycythemia vera. *Blood.* 2000;96(4):1582–4. [https://doi.org/10.1182/blood.v96.4.1582.h8001582\\_1582\\_1584](https://doi.org/10.1182/blood.v96.4.1582.h8001582_1582_1584) PMID: [10942409](https://pubmed.ncbi.nlm.nih.gov/10942409/)
25. John CC, Opoka R, Latham T, Hume H, Nakafeero M, Kasirye P, et al. Optimizing Hydroxyurea Dosing in Sickle Cell Anemia: The Uganda MTD Study. *Blood.* 2019;134(Supplement\_1):520–520. <https://doi.org/10.1182/blood-2019-125128>
